# Supplementary material
Source: HighWire-hosted journal article supplement (https://cmaj.ca/highwire/filestream/148520/field_highwire_adjunct_files/0/220717-res-1-at.pdf)
Supplement: 220717-res-1-at.pdf [file 220717-res-1-at.pdf]

## Appendix 1 (as supplied by authors): Administrative Data Holdings

**Table S1. Administrative datasets held at ICES and used for this study.**

| <b>Data Source</b>                                                                                        | <b>Timeframe of Records</b>                          | <b>Information</b>                                                                                                                                                                                                                                                                           |
|-----------------------------------------------------------------------------------------------------------|------------------------------------------------------|----------------------------------------------------------------------------------------------------------------------------------------------------------------------------------------------------------------------------------------------------------------------------------------------|
| Registered Persons Database (RPDB)                                                                        | 1991 to Dec 2018                                     | Contains information on all individuals insured by the Ontario Health Insurance Plan (OHIP) including date of birth, sex, date of death, age, and postal code.                                                                                                                               |
| Canadian Institute for Health Information Discharge Abstract Database (CIHI-DAD)                          | 1988 to Dec 2018                                     | Information on all inpatient hospital discharges                                                                                                                                                                                                                                             |
| Ontario Health Insurance Plan (OHIP) Physician Claims database                                            | 1991 to Dec 2018                                     | Records all physician services reimbursed by the Ontario Health Insurance Plan. Each claim contains a diagnosis code.                                                                                                                                                                        |
| Canadian Institute for Health Information National Ambulatory Care Reporting System (CIHI-NACRS) database | 2000 to Dec 2018                                     | Contains information on all visits to emergency departments, and hospital outpatient clinics, including cancer and dialysis clinics                                                                                                                                                          |
| Ontario Drug Benefit (ODB) database                                                                       | 1991 to Dec 2018                                     | Documents prescriptions covered by the Ontario Ministry of Health and Long-Term Care. Includes all prescriptions filled by individuals aged 65 years and older, as well as by individuals on social assistance, in long-term care facilities, or who have high drug costs relative to income |
| Ontario Cancer Registry (OCR)                                                                             | 1964 to Dec 2018                                     | Information on all Ontario residents who have been diagnosed with cancer. Including diagnosis date, type of cancer, admissions, discharge reports and pathology information.                                                                                                                 |
| Office of the Registrar General Deaths register (ORGD)                                                    | 1990 to Dec 2018                                     | Contains information regarding date and cause of death.                                                                                                                                                                                                                                      |
| Ontario Mental Health Reporting System (OMHRS)                                                            | 2005 to Dec 2018                                     | Admissions to mental health–designated hospital beds.                                                                                                                                                                                                                                        |
| Ontario HIV Database                                                                                      | 1991 to Dec 2018                                     | ICES-derived administrative data registry of Ontario residents with diagnosed HIV infection.                                                                                                                                                                                                 |
| Indian Register (IR)                                                                                      | Registered as of Dec 31, 2014                        | Includes demographic and administrative information for persons registered as status First Nations under the <i>Indian Act</i> , maintained by Indigenous Services Canada.                                                                                                                   |
| Public Health Ontario (PHO) Laboratory Records                                                            | 1997 to Dec 2018 for HBV<br>1999 to Dec 2018 for HCV | Hepatitis B virus (HBV) and HCV testing records using laboratory data extracted from Public Health Ontario Laboratory’s former and current Laboratory Information Management Systems.                                                                                                        |
| Canadian Institute for Health Information Same Day Surgery (CIHI-SDS) Database                            | 1991 to Dec 2018                                     | Documents ambulatory care visits for outpatient surgery and procedures.                                                                                                                                                                                                                      |

|                                                   |              |                                                                                                                                                                                                                                                                                |
|---------------------------------------------------|--------------|--------------------------------------------------------------------------------------------------------------------------------------------------------------------------------------------------------------------------------------------------------------------------------|
| Inside/Outside of First Nations Community Dataset | 2001 to 2018 | Documents whether an individual in the IR resided within or outside of a First Nations community at year of reference using postal and residence codes. Determined using First Nations and Treaties' map from the Ontario Ministry of Indigenous Relations and Reconciliation. |
|---------------------------------------------------|--------------|--------------------------------------------------------------------------------------------------------------------------------------------------------------------------------------------------------------------------------------------------------------------------------|
